# Supplementary material for: Phenotypic and Genotypic Analysis of Antimicrobial Resistance in Escherichia coli Recovered from Feedlot Beef Cattle in Australia
Source: MDPI journal article supplement (doi:10.3390/ani12172256), 2022-08-31
Supplement: s1 [file s1]

**Table S1.** The antimicrobial resistance pattern of *E. coli* isolated from antimicrobial treated and non-treated cattle at feedlot exit

| Number of antimicrobial classes | Total no. of isolates (%) |              | Resistance pattern (no. of isolates)                                                             |                                                           |
|---------------------------------|---------------------------|--------------|--------------------------------------------------------------------------------------------------|-----------------------------------------------------------|
|                                 | Non-treated (122)         | Treated (13) | Non-treated                                                                                      | Treated                                                   |
| All sensitive                   | 93 (76.23)                | 10 (76.9)    | 93                                                                                               | 10                                                        |
| 1                               | 15 (12.29)                | 2 (15.4)     | TET (12)<br>FIS (1)<br>AMP (1)<br>AUG2-FOX (1)                                                   | TET (1)(***)<br>AMP-AUG2-AXO-FOX-XNL (1) <sup>a(**)</sup> |
| 2                               | 4 (3.28)                  |              | AMP-TET (3)<br>FIS-TET (1)                                                                       |                                                           |
| 3                               | 7 (5.74)                  |              | FIS-STR-TET (3)<br>AMP-STR-TET(3)<br>AMP-AXO-AZI-TET-XNL (1) <sup>a</sup>                        |                                                           |
| 5                               | 3 (2.46)                  | 1 (7.7)      | AMP-AXO-AZI-FIS-STR-TET-XNL (2) <sup>a</sup><br>AMP-AXO-CHL-FIS-STR-SXT-TET-XNL (1) <sup>a</sup> | AMP-AXO-FIS-STR-SXT-TET-XNL (1) <sup>a(*)</sup>           |
| Resistance (%)                  | 29 (23.8)                 | 3 (23.1)     |                                                                                                  |                                                           |
| P-value                         | 0.955                     |              |                                                                                                  |                                                           |

<sup>a</sup>ESBL producing *E.coli*; <sup>\*</sup>Draxxin Tulathromycin); <sup>\*\*</sup>Excede (Ceftiofur); <sup>\*\*\*</sup>Bivatop (Oxytetracycline); **AUG** (Amoxicillin/clavulanic acid), **AMP** (Ampicillin), **FOX** (Cefoxitin), **XNL** (Ceftiofur), **AXO** (Ceftriaxone), **CHL** (Chloramphenicol), **STR** (Streptomycin), **FIS** (Sulfisoxazole), **TET** (Tetracycline) and **SXT** (Trimethoprim/sulfamethoxazole)

**Table S2.** Agreement between antimicrobial resistance phenotypes and resistance gene detection among 37 isolates submitted for WGS

| Isolates | Phenotypic AMR pattern | Genotypic AMR pattern |
|----------|------------------------|-----------------------|
| N001     | Susceptible            | -                     |
| N002     | Susceptible            | -                     |
| N308     | Susceptible            | -                     |
| N309     | Susceptible            | -                     |

|      |                             |                                                                                                                                                      |
|------|-----------------------------|------------------------------------------------------------------------------------------------------------------------------------------------------|
| N338 | FIS                         | <i>sul2</i>                                                                                                                                          |
| N344 | AMP                         | <i>bla</i> <sub>TEM-1B</sub>                                                                                                                         |
| N330 | AMP-AUG-AXO-FOX-XNL         | <i>bla</i> <sub>CMY-2</sub>                                                                                                                          |
| N305 | TET                         | <i>tet</i> (B)                                                                                                                                       |
| N314 | TET                         | <i>tet</i> (B)                                                                                                                                       |
| N316 | TET                         | <i>tet</i> (B)                                                                                                                                       |
| N348 | TET                         | <i>tet</i> (A)                                                                                                                                       |
| N351 | TET                         | <i>tet</i> (B)                                                                                                                                       |
| N352 | TET                         | <i>tet</i> (B)                                                                                                                                       |
| N355 | TET                         | <i>tet</i> (A)                                                                                                                                       |
| N396 | TET                         | -                                                                                                                                                    |
| N401 | TET                         | <i>tet</i> (B)                                                                                                                                       |
| N413 | TET                         | <i>tet</i> (B)                                                                                                                                       |
| N415 | TET                         | <i>tet</i> (A)                                                                                                                                       |
| N435 | TET                         | <i>tet</i> (B)                                                                                                                                       |
| N442 | TET                         | <i>tet</i> (A)                                                                                                                                       |
| N321 | AMP-TET                     | <i>bla</i> <sub>TEM-1C</sub> , <i>tet</i> (A)                                                                                                        |
| N358 | AMP-TET                     | <i>bla</i> <sub>TEM-1C</sub> , <i>tet</i> (A)                                                                                                        |
| N381 | AMP-TET                     | <i>aph</i> (3'')-Ib, <i>aph</i> (6)-Id, <i>bla</i> <sub>TEM-1B</sub> , <i>tet</i> (B)                                                                |
| N385 | FIS-TET                     | <i>sul2</i> , <i>tet</i> (B)                                                                                                                         |
| N112 | AMP-AUG-AXO-FOX-TET-XNL     | <i>bla</i> <sub>CMY-2</sub> , <i>bla</i> <sub>TEM-1B</sub> , <i>dfrA5</i> , <i>tet</i> (A)                                                           |
| N324 | AMP-STR-TET                 | <i>aph</i> (3'')-Ib, <i>aph</i> (6)-Id, <i>bla</i> <sub>TEM-1B</sub> , <i>tet</i> (B)                                                                |
| N333 | AMP-STR-TET                 | <i>aph</i> (3'')-Ib, <i>aph</i> (6)-Id, <i>bla</i> <sub>TEM-1B</sub> , <i>tet</i> (B)                                                                |
| N341 | AMP-STR-TET                 | <i>aph</i> (3'')-Ib, <i>aph</i> (6)-Id, <i>bla</i> <sub>TEM-1B</sub> , <i>tet</i> (B)                                                                |
| N054 | AMP-STR-SXT                 | <i>aph</i> (3')-Ia, <i>aph</i> (3'')-Ib, <i>aph</i> (6)-Id, <i>bla</i> <sub>TEM-1B</sub> , <i>dfrA5</i> , <i>sul2</i>                                |
| N369 | FIS-STR-TET                 | <i>aph</i> (3'')-Ib, <i>aph</i> (6)-Id, <i>sul2</i> , <i>tet</i> (B)                                                                                 |
| N373 | FIS-STR-TET                 | <i>aph</i> (3'')-Ib, <i>aph</i> (6)-Id, <i>sul2</i> , <i>tet</i> (B)                                                                                 |
| N443 | FIS-STR-TET                 | <i>aph</i> (3'')-Ib, <i>aph</i> (6)-Id, <i>sul2</i> , <i>tet</i> (B)                                                                                 |
| N325 | AMP-AXO-AZI-TET-XNL         | <i>bla</i> <sub>CTX-M-15</sub> , <i>mph</i> (A), <i>mph</i> (E), <i>msr</i> (E), <i>tet</i> (A)                                                      |
| N423 | AMP-AXO-FIS-STR-SXT-TET-XNL | <i>aph</i> (3'')-Ib, <i>aph</i> (6)-Id, <i>bla</i> <sub>CTX-M-15</sub> , <i>bla</i> <sub>TEM-1B</sub> , <i>dfrA14</i> , <i>sul2</i> , <i>tet</i> (A) |
| N307 | AMP-AXO-AZI-FIS-STR-TET-XNL | <i>aph</i> (3'')-Ib, <i>aph</i> (6)-Id, <i>bla</i> <sub>CTX-M-27</sub> , <i>mph</i> (A), <i>sul2</i> , <i>tet</i> (A)                                |
| N347 | AMP-AXO-AZI-FIS-STR-TET-XNL | <i>aph</i> (3'')-Ib, <i>aph</i> (6)-Id, <i>bla</i> <sub>CTX-M-27</sub> , <i>mph</i> (A), <i>sul2</i> , <i>tet</i> (A)                                |

N354      AMP-AXO-CHL-FIS-STR-TET-XNL      *aac(3)-IV,ant(3'')-Ia,aph(3'')-Ib, aph(4)-Ia, aph(6)-Id, bla<sub>CTX-M-15</sub>, bla<sub>TEM-1B</sub>, cmlA1, dfrA12, qnrS1, sul1, sul3, tet(A)*

---

**Table S3.** Correlation analysis of phenotypic and genotypic AMR in *E.coli* isolated from feedlot and abattoir

[illegible]

STR\_P<sup>0.426</sup> - 0.290<sup>0.24</sup> 0.256<sup>0.59</sup> - 1.00  
\* 0.155 0 6\* 0.15 5 0  
(0.00 (0.35 (0.08 (0.1 (0.12 (0.0 (0.35  
8) 8) 2) 52) 6) 00) 8)

SXT\_P<sup>0.360</sup> - 0.362<sup>-</sup> 0.08<sup>0.561</sup> 0.29<sup>-</sup> 0.45 1.00  
\* 0.071 \* 8 \* 3 0.07 7\* 0  
1  
(0.02 (0.67 (0.02 (0.6 (0.00 (0.0 (0.67 (0.0  
9) 6) 8) 04) 0) 78) 6) 04)

TET\_P<sup>-</sup> 0.033<sup>-</sup> 0.165<sup>0.086</sup> 0.15<sup>0.14</sup> 0.088<sup>0.16</sup> 0.19<sup>-</sup> 0.08<sup>-</sup> 1.00  
0.165 6 5 5 8 5 0  
(0.84 (0.33 (0.61 (0.3 (0.60 (0.3 (0.33 (0.2 (0.6  
8) 0) 2) 56) 6) 93) 0) 40) 19)

XNL\_P<sup>0.585</sup> 0.495 1.000 0.61 0.345 0.36 0.49 0.29 0.36 0.08  
\* \* \* 5\* \* 9\* 5\* 0 2\* 6 1.000  
(0.00 (0.00 (0.00 (0.0 (0.03 (0.0 (0.00 (0.0 (0.0 (0.6  
0) 2) 0) 00) 6) 24) 2) 82) 28) 12)

AMP\_G<sup>1.000</sup> 0.289<sup>0.585</sup> 0.36<sup>0.202</sup> 0.04 0.28 0.42 0.36 0.03 0.585  
\* 0\* 0.202 5 9 6\* 0\* 3 \* 1.000  
(0.00 (0.08 (0.00 (0.0 (0.23 (0.7 (0.08 (0.0 (0.0 (0.8 (0.00  
0) 2) 0) 29) 1) 91) 2) 08) 29) 48) 0)

AUG\_G<sup>-</sup> 0.289<sup>1.000</sup> 0.495<sup>-</sup> 0.07<sup>-</sup> 0.040<sup>-</sup> 0.13<sup>1.00</sup> 0.15<sup>-</sup> 0.07<sup>-</sup> 0.16<sup>-</sup> 0.495  
\* \* 1 0.040 6 0\* 5 1 5 \* 0.289 1.000  
(0.08 (0.00 (0.00 (0.6 (0.81 (0.4 (0.00 (0.3 (0.6 (0.3 (0.00 (0.08  
2) 0) 2) 76) 5) 24) 0) 58) 76) 30) 2) 2)

AXO\_G<sup>0.585</sup> 0.495 1.000 0.61 0.345 0.36 0.49 0.29 0.36 0.08 1.000 0.585 0.495  
\* \* \* 5\* \* 9\* 5\* 0 2\* 6 \* \* \* 1.000  
(0.00 (0.00 (0.00 (0.0 (0.03 (0.0 (0.00 (0.0 (0.0 (0.6 (0.00 (0.00 (0.00  
0) 2) 0) 00) 6) 24) 2) 82) 28) 12) 0) 0) 2)

|       |        |       |       |       |       |      |       |      |      |       |       |        |       |       |       |
|-------|--------|-------|-------|-------|-------|------|-------|------|------|-------|-------|--------|-------|-------|-------|
| AZI_  | 0.360  | -     | 0.615 | 1.00  | -     | 0.29 | -     | 0.24 | -    | 0.15  | 0.615 | 0.360  | -     | 0.615 | 1.00  |
| G     | *      | 0.071 | *     | 0*    | 0.050 | 3    | 0.07  | 0    | 0.08 | 6     | *     | *      | 0.071 | *     | 0     |
|       | (0.02  | (0.67 | (0.00 | (0.0  | (0.77 | (0.0 | (0.67 | (0.1 | (0.6 | (0.3  | (0.00 | (0.02  | (0.67 | (0.00 |       |
|       | 9)     | 6)    | 0)    | 00)   | 1)    | 78)  | 6)    | 52)  | 04)  | 56)   | 0)    | 9)     | 6)    | 0)    |       |
| CHL_  | -0.202 | -     | 0.345 | -     | 1.000 | 0.29 | -     | 0.25 | 0.56 | 0.08  | 0.345 | -0.202 | -     | 0.345 | -     |
| G     | -0.040 | *     | 0.05  | 0     | *     | 4    | 0.04  | 6    | 1*   | 8     | *     | -0.040 | *     | 0.05  | 1.000 |
|       | (0.23  | (0.81 | (0.03 | (0.7  | (0.00 | (0.0 | (0.81 | (0.1 | (0.0 | (0.6  | (0.03 | (0.23  | (0.81 | (0.03 | (0.77 |
|       | 1)     | 5)    | 6)    | 71)   | 0)    | 77)  | 5)    | 26)  | 00)  | 06)   | 6)    | 1)     | 5)    | 6)    | 1)    |
| FIS_G | 0.117  | -     | 0.328 | 0.26  | 0.274 | 0.93 | -     | 0.66 | 0.48 | 0.02  | 0.328 | 0.117  | -     | 0.328 | 0.26  |
|       | 0.145  | *     | 5     | 0.274 | 2*    | 0.14 | 5     | 9*   | 8*   | 4     | *     | 0.145  | *     | 5     | 0.274 |
|       | (0.48  | (0.39 | (0.04 | (0.1  | (0.10 | (0.0 | (0.39 | (0.0 | (0.0 | (0.8  | (0.04 | (0.48  | (0.39 | (0.04 | (0.11 |
|       | 9)     | 0)    | 8)    | 13)   | 1)    | 00)  | 0)    | 00)  | 02)  | 88)   | 8)    | 9)     | 0)    | 8)    | 3)    |
| FOX_  | 1.000  | 0.495 | -     | -     | -     | 1.00 | -     | -    | -    | 0.495 | -     | 1.000  | 0.495 | -     | -     |
| G     | -0.289 | *     | *     | 0.07  | 0.040 | 0.13 | 0*    | 0.15 | 0.07 | 0.16  | *     | -0.289 | *     | *     | 0.07  |
|       | (0.08  | (0.00 | (0.00 | (0.6  | (0.81 | (0.4 | (0.00 | (0.3 | (0.6 | (0.3  | (0.00 | (0.08  | (0.00 | (0.00 | (0.67 |
|       | 2)     | 0)    | 2)    | 76)   | 5)    | 24)  | 0)    | 58)  | 76)  | 30)   | 2)    | 2)     | 0)    | 2)    | 6)    |
| STR_  | 0.486  | -     | 0.255 | 0.21  | 0.241 | 0.54 | -     | 0.93 | 0.42 | 0.22  | 0.255 | 0.486  | -     | 0.255 | 0.21  |
| G     | *      | 0.166 | 0.255 | 7     | 0.241 | 9*   | 0.16  | 9*   | 9*   | 4     | 0.255 | *      | 0.166 | 0.255 | 7     |
|       | (0.00  | (0.32 | (0.12 | (0.1  | (0.15 | (0.0 | (0.32 | (0.0 | (0.0 | (0.1  | (0.12 | (0.00  | (0.32 | (0.12 | (0.19 |
|       | 2)     | 7)    | 8)    | 97)   | 2)    | 00)  | 7)    | 00)  | 08)  | 83)   | 8)    | 2)     | 7)    | 8)    | 7)    |
| SXT_  | 0.422  | 0.302 | 0.499 | -     | 0.479 | 0.20 | 0.30  | 0.34 | 0.85 | -     | 0.499 | 0.422  | 0.302 | 0.499 | -     |
| G     | *      | 0.302 | *     | 0.10  | *     | 8    | 2     | 5*   | 3*   | 0.02  | *     | *      | 0.302 | *     | 0.10  |
|       | (0.00  | (0.07 | (0.00 | (0.5  | (0.00 | (0.2 | (0.07 | (0.0 | (0.0 | (0.8  | (0.00 | (0.00  | (0.07 | (0.00 | (0.54 |
|       | 9)     | 0)    | 2)    | 42)   | 3)    | 16)  | 0)    | 37)  | 00)  | 67)   | 2)    | 9)     | 0)    | 2)    | 2)    |
| TET_  | -0.083 | -     | 0.113 | 0.16  | 0.094 | 0.17 | -     | 0.23 | -    | 0.92  | -     | -0.083 | -     | 0.113 | 0.16  |
| G     | 0.143  | 0.113 | 8     | 0.094 | 5     | 0.14 | 3     | 1    | 0.06 | 6*    | 0.113 | 0.083  | 0.143 | 0.113 | 8     |
|       | (0.00  | (0.32 | (0.12 | (0.1  | (0.15 | (0.0 | (0.32 | (0.0 | (0.0 | (0.8  | (0.04 | (0.48  | (0.39 | (0.04 | (0.11 |
|       | 9)     | 0)    | 8)    | 13)   | 1)    | 00)  | 0)    | 00)  | 02)  | 88)   | 8)    | 9)     | 0)    | 8)    | 3)    |
|       | (0.08  | (0.00 | (0.00 | (0.6  | (0.81 | (0.4 | (0.00 | (0.3 | (0.6 | (0.3  | (0.00 | (0.08  | (0.00 | (0.00 | (0.67 |
|       | 2)     | 0)    | 2)    | 76)   | 5)    | 24)  | 0)    | 58)  | 76)  | 30)   | 2)    | 2)     | 0)    | 2)    | 6)    |
|       | (0.00  | (0.32 | (0.12 | (0.1  | (0.15 | (0.0 | (0.32 | (0.0 | (0.0 | (0.8  | (0.04 | (0.48  | (0.39 | (0.04 | (0.11 |
|       | 2)     | 7)    | 8)    | 97)   | 2)    | 00)  | 7)    | 00)  | 08)  | 83)   | 8)    | 2)     | 7)    | 8)    | 7)    |
|       | (0.00  | (0.32 | (0.12 | (0.1  | (0.15 | (0.0 | (0.32 | (0.0 | (0.0 | (0.8  | (0.04 | (0.48  | (0.39 | (0.04 | (0.11 |
|       | 2)     | 7)    | 8)    | 97)   | 2)    | 00)  | 7)    | 00)  | 08)  | 83)   | 8)    | 2)     | 7)    | 8)    | 7)    |
|       | (0.00  | (0.32 | (0.12 | (0.1  | (0.15 | (0.0 | (0.32 | (0.0 | (0.0 | (0.8  | (0.04 | (0.48  | (0.39 | (0.04 | (0.11 |
|       | 2)     | 7)    | 8)    | 97)   | 2)    | 00)  | 7)    | 00)  | 08)  | 83)   | 8)    | 2)     | 7)    | 8)    | 7)    |
|       | (0.00  | (0.32 | (0.12 | (0.1  | (0.15 | (0.0 | (0.32 | (0.0 | (0.0 | (0.8  | (0.04 | (0.48  | (0.39 | (0.04 | (0.11 |
|       | 2)     | 7)    | 8)    | 97)   | 2)    | 00)  | 7)    | 00)  | 08)  | 83)   | 8)    | 2)     | 7)    | 8)    | 7)    |
|       | (0.00  | (0.32 | (0.12 | (0.1  | (0.15 | (0.0 | (0.32 | (0.0 | (0.0 | (0.8  | (0.04 | (0.48  | (0.39 | (0.04 | (0.11 |
|       | 2)     | 7)    | 8)    | 97)   | 2)    | 00)  | 7)    | 00)  | 08)  | 83)   | 8)    | 2)     | 7)    | 8)    | 7)    |
|       | (0.00  | (0.32 | (0.12 | (0.1  | (0.15 | (0.0 | (0.32 | (0.0 | (0.0 | (0.8  | (0.04 | (0.48  | (0.39 | (0.04 | (0.11 |
|       | 2)     | 7)    | 8)    | 97)   | 2)    | 00)  | 7)    | 00)  | 08)  | 83)   | 8)    | 2)     | 7)    | 8)    | 7)    |
|       | (0.00  | (0.32 | (0.12 | (0.1  | (0.15 | (0.0 | (0.32 | (0.0 | (0.0 | (0.8  | (0.04 | (0.48  | (0.39 | (0.04 | (0.11 |
|       | 2)     | 7)    | 8)    | 97)   | 2)    | 00)  | 7)    | 00)  | 08)  | 83)   | 8)    | 2)     | 7)    | 8)    | 7)    |
|       | (0.00  | (0.32 | (0.12 | (0.1  | (0.15 | (0.0 | (0.32 | (0.0 | (0.0 | (0.8  | (0.04 | (0.48  | (0.39 | (0.04 | (0.11 |
|       | 2)     | 7)    | 8)    | 97)   | 2)    | 00)  | 7)    | 00)  | 08)  | 83)   | 8)    | 2)     | 7)    | 8)    | 7)    |
|       | (0.00  | (0.32 | (0.12 | (0.1  | (0.15 | (0.0 | (0.32 | (0.0 | (0.0 | (0.8  | (0.04 | (0.48  | (0.39 | (0.04 | (0.11 |
|       | 2)     | 7)    | 8)    | 97)   | 2)    | 00)  | 7)    | 00)  | 08)  | 83)   | 8)    | 2)     | 7)    | 8)    | 7)    |
|       | (0.00  | (0.32 | (0.12 | (0.1  | (0.15 | (0.0 | (0.32 | (0.0 | (0.0 | (0.8  | (0.04 | (0.48  | (0.39 | (0.04 | (0.11 |
|       | 2)     | 7)    | 8)    | 97)   | 2)    | 00)  | 7)    | 00)  | 08)  | 83)   | 8)    | 2)     | 7)    | 8)    | 7)    |
|       | (0.00  | (0.32 | (0.12 | (0.1  | (0.15 | (0.0 | (0.32 | (0.0 | (0.0 | (0.8  | (0.04 | (0.48  | (0.39 | (0.04 | (0.11 |
|       | 2)     | 7)    | 8)    | 97)   | 2)    | 00)  | 7)    | 00)  | 08)  | 83)   | 8)    | 2)     | 7)    | 8)    | 7)    |
|       | (0.00  | (0.32 | (0.12 | (0.1  | (0.15 | (0.0 | (0.32 | (0.0 | (0.0 | (0.8  | (0.04 | (0.48  | (0.39 | (0.04 | (0.11 |
|       | 2)     | 7)    | 8)    | 97)   | 2)    | 00)  | 7)    | 00)  | 08)  | 83)   | 8)    | 2)     | 7)    | 8)    | 7)    |
|       | (0.00  | (0.32 | (0.12 | (0.1  | (0.15 | (0.0 | (0.32 | (0.0 | (0.0 | (0.8  | (0.04 | (0.48  | (0.39 | (0.04 | (0.11 |
|       | 2)     | 7)    | 8)    | 97)   | 2)    | 00)  | 7)    | 00)  | 08)  | 83)   | 8)    | 2)     | 7)    | 8)    | 7)    |
|       | (0.00  | (0.32 | (0.12 | (0.1  | (0.15 | (0.0 | (0.32 | (0.0 | (0.0 | (0.8  | (0.04 | (0.48  | (0.39 | (0.04 | (0.11 |
|       | 2)     | 7)    | 8)    | 97)   | 2)    | 00)  | 7)    | 00)  | 08)  | 83)   | 8)    | 2)     | 7)    | 8)    | 7)    |
|       | (0.00  | (0.32 | (0.12 | (0.1  | (0.15 | (0.0 | (0.32 | (0.0 | (0.0 | (0.8  | (0.04 | (0.48  | (0.39 | (0.04 | (0.11 |
|       | 2)     | 7)    | 8)    | 97)   | 2)    | 00)  | 7)    | 00)  | 08)  | 83)   | 8)    | 2)     | 7)    | 8)    | 7)    |
|       | (0.00  | (0.32 | (0.12 | (0.1  | (0.15 | (0.0 | (0.32 | (0.0 | (0.0 | (0.8  | (0.04 | (0.48  | (0.39 | (0.04 | (0.11 |
|       | 2)     | 7)    | 8)    | 97)   | 2)    | 00)  | 7)    | 00)  | 08)  | 83)   | 8)    | 2)     | 7)    | 8)    | 7)    |
|       | (0.00  | (0.32 | (0.12 | (0.1  | (0.15 | (0.0 | (0.32 | (0.0 | (0.0 | (0.8  | (0.04 | (0.48  | (0.39 | (0.04 | (0.11 |
|       | 2)     | 7)    | 8)    | 97)   | 2)    | 00)  | 7)    | 00)  | 08)  | 83)   | 8)    | 2)     | 7)    | 8)    | 7)    |
|       | (0.00  | (0.32 | (0.12 | (0.1  | (0.15 | (0.0 | (0.32 | (0.0 | (0.0 | (0.8  | (0.04 | (0.48  | (0.39 | (0.04 | (0.11 |
|       | 2)     | 7)    | 8)    | 97)   | 2)    | 00)  | 7)    | 00)  | 08)  | 83)   | 8)    | 2)     | 7)    | 8)    | 7)    |
|       | (0.00  | (0.32 | (0.12 | (0.1  | (0.15 | (0.0 | (0.32 | (0.0 | (0.0 | (0.8  | (0.04 | (0.48  | (0.39 | (0.04 | (0.11 |
|       | 2)     | 7)    | 8)    | 97)   | 2)    | 00)  | 7)    | 00)  | 08)  | 83)   | 8)    | 2)     | 7)    | 8)    | 7)    |
|       | (0.00  | (0.32 | (0.12 | (0.1  | (0.15 | (0.0 | (0.32 | (0.0 | (0.0 | (0.8  | (0.04 | (0.48  | (0.39 | (0.04 | (0.11 |
|       | 2)     | 7)    | 8)    | 97)   | 2)    | 00)  | 7)    | 00)  | 08)  | 83)   | 8)    | 2)     | 7)    | 8)    | 7)    |
|       | (0.00  | (0.32 | (0.12 | (0.1  | (0.15 | (0.0 | (0.32 | (0.0 | (0.0 | (0.8  | (0.04 | (0.48  | (0.39 | (0.04 | (0.11 |
|       | 2)     | 7)    | 8)    | 97)   | 2)    | 00)  | 7)    | 00)  | 08)  | 83)   | 8)    | 2)     | 7)    | 8)    | 7)    |
|       | (0.00  | (0.32 | (0.12 | (0.1  | (0.15 | (0.0 | (0.32 | (0.0 | (0.0 | (0.8  | (0.04 | (0.48  | (0.39 | (0.04 | (0.11 |
|       | 2)     | 7)    | 8)    | 97)   | 2)    | 00)  | 7)    | 00)  | 08)  | 83)   | 8)    | 2)     | 7)    | 8)    | 7)    |
|       | (0.00  | (0.32 | (0.12 | (0.1  | (0.15 | (0.0 | (0.32 | (0.0 | (0.0 | (0.8  | (0.04 | (0.48  | (0.39 | (0.04 | (0.11 |
|       | 2)     | 7)    | 8)    | 97)   | 2)    | 00)  | 7)    | 00)  | 08)  | 83)   | 8)    | 2)     | 7)    | 8)    | 7)    |
|       | (0.00  | (0.32 | (0.12 | (0.1  | (0.15 | (0.0 | (0.32 | (0.0 | (0.0 | (0.8  | (0.04 | (0.48  | (0.39 | (0.04 | (0.11 |
|       | 2)     | 7)    | 8)    | 97)   | 2)    | 00)  | 7)    | 00)  | 08)  | 83)   | 8)    | 2)     | 7)    | 8)    | 7)    |
|       | (0.00  | (0.32 | (0.12 | (0.1  | (0.15 | (0.0 | (0.32 | (0.0 | (0.0 | (0.8  | (0.04 | (0.48  | (0.39 | (0.04 | (0.11 |
|       | 2)     | 7)    | 8)    | 97)   | 2)    | 00)  | 7)    | 00)  | 08)  | 83)   | 8)    | 2)     | 7)    | 8)    | 7)    |
|       | (0.00  | (0.32 | (0.12 | (0.1  | (0.15 | (0.0 | (0.32 | (0.0 | (0.0 | (0.8  | (0.04 | (0.48  | (0.39 | (0.04 | (0.11 |
|       | 2)     | 7)    | 8)    | 97)   | 2)    | 00)  | 7)    | 00)  | 08)  | 83)   | 8)    | 2)     | 7)    | 8)    | 7)    |
|       | (0.00  | (0.32 | (0.12 | (0.1  | (0.15 | (0.0 | (0.32 | (0.0 | (0.0 | (0.8  | (0.04 | (0.48  | (0.39 | (0.04 | (0.11 |
|       | 2)     | 7)    | 8)    | 97)   | 2)    | 00)  | 7)    | 00)  | 08)  | 83)   | 8)    | 2)     | 7)    | 8)    | 7)    |
|       | (0.00  | (0.32 | (0.12 | (0.1  | (0.15 | (0.0 | (0.32 | (0.0 | (0.0 | (0.8  | (0.04 | (0.48  | (0.39 | (0.04 | (0.11 |
|       | 2)     | 7)    | 8)    | 97)   | 2)    | 00)  | 7)    | 00)  | 08)  | 83)   | 8)    | 2)     | 7)    | 8)    | 7)    |
|       | (0.00  | (0.32 | (0.12 | (0.1  | (0.15 | (0.0 | (0.32 | (0.0 | (0.0 | (0.8  | (0.04 | (0.48  | (0.39 | (0.04 | (0.11 |
|       | 2)     | 7)    | 8)    | 97)   | 2)    | 00)  | 7)    | 00)  | 08)  | 83)   | 8)    | 2)     | 7)    | 8)    | 7)    |
|       | (0.00  | (0.32 |       |       |       |      |       |      |      |       |       |        |       |       |       |

|                    |             |             |             |             |             |             |             |             |             |             |             |             |             |             |             |             |             |             |             |             |             |       |
|--------------------|-------------|-------------|-------------|-------------|-------------|-------------|-------------|-------------|-------------|-------------|-------------|-------------|-------------|-------------|-------------|-------------|-------------|-------------|-------------|-------------|-------------|-------|
|                    | (0.62<br>4) | (0.39<br>8) | (0.50<br>5) | (0.3<br>19) | (0.57<br>8) | (0.3<br>01) | (0.39<br>8) | (0.1<br>69) | (0.7<br>14) | (0.0<br>00) | (0.50<br>5) | (0.62<br>4) | (0.39<br>8) | (0.50<br>5) | (0.31<br>9) | (0.57<br>8) | (0.7<br>18) | (0.39<br>8) | (0.12<br>3) | (0.97<br>4) |             |       |
| XNL_               | 0.585       | 0.495       | 1.000       | 0.61        | 0.345       | 0.36        | 0.49        | 0.29        | 0.36        | 0.08        | 1.000       | 0.585       | 0.495       | 1.000       | 0.61        | 0.345       | 0.32        | 0.495       | 0.25        | 0.49        | 0.11        |       |
| G                  | *           | *           | *           | 5*          | *           | 9*          | 5*          | 0           | 2*          | 6           | *           | *           | *           | *           | 5*          | *           | 8*          | *           | 5           | 9*          | 3           | 1.000 |
|                    | (0.00<br>0) | (0.00<br>2) | (0.00<br>0) | (0.0<br>00) | (0.03<br>6) | (0.0<br>24) | (0.00<br>2) | (0.0<br>82) | (0.0<br>28) | (0.6<br>12) | (0.00<br>0) | (0.00<br>0) | (0.00<br>2) | (0.00<br>0) | (0.00<br>0) | (0.03<br>6) | (0.0<br>48) | (0.00<br>2) | (0.12<br>8) | (0.00<br>2) | (0.50<br>5) |       |
| <i>* p&lt;0.05</i> |             |             |             |             |             |             |             |             |             |             |             |             |             |             |             |             |             |             |             |             |             |       |
